# Supplementary material
Source: PubMed Central journal article supplement (PMC2141862)

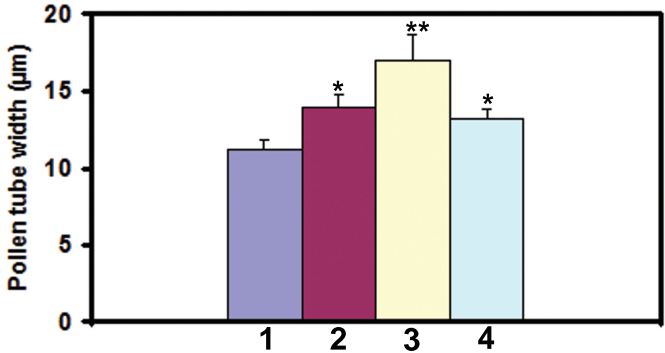

Supplement: pnas_0705874104_1.pdf [file pnas_0705874104_1.pdf]
